# Supplementary material for: Water quality changes during the first meter of managed aquifer recharge
Source: Royal Society of Chemistry journal article supplement (doi:10.1039/d0ew00839g), 2021-01-01
Supplement: d0ew00839g1.pdf [file d0ew00839g1.pdf]

## Appendix

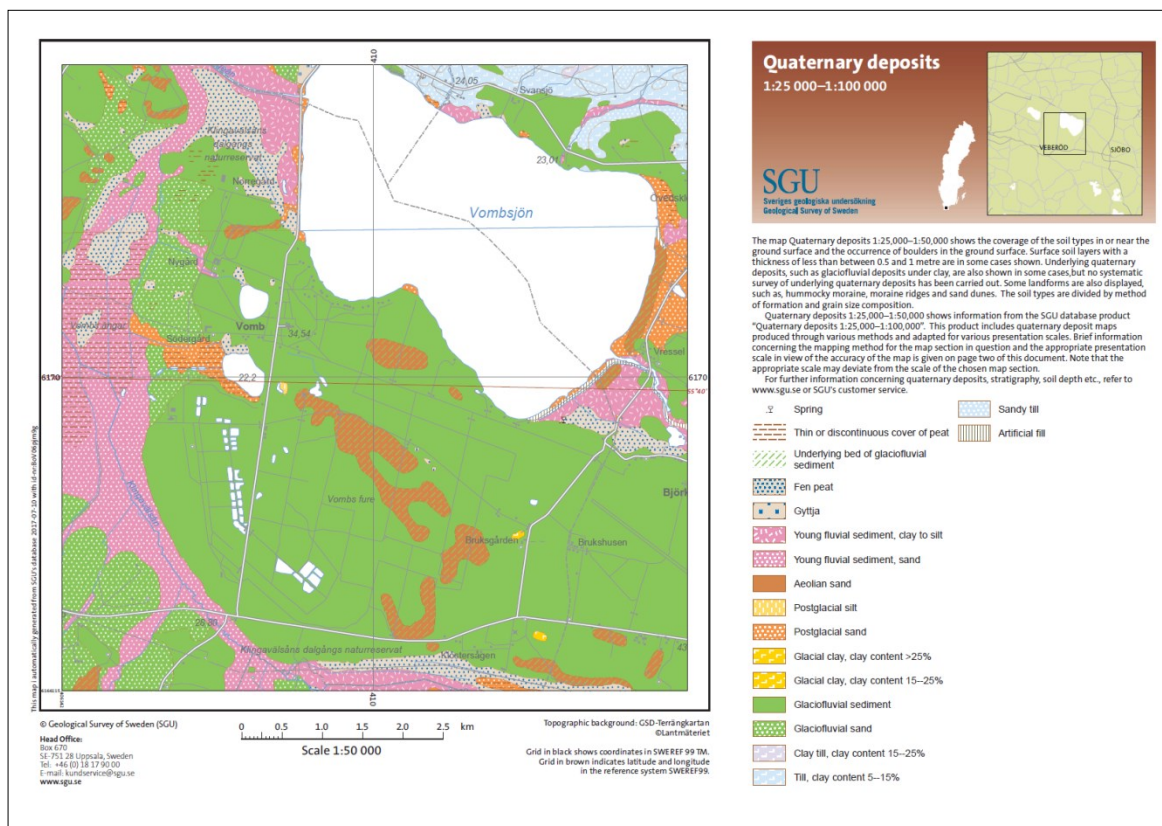

**Fig. A1** Overview of the study area (Source: Geological Survey of Sweden, © Sveriges geologiska undersökning, [www.sgu.se](http://www.sgu.se))

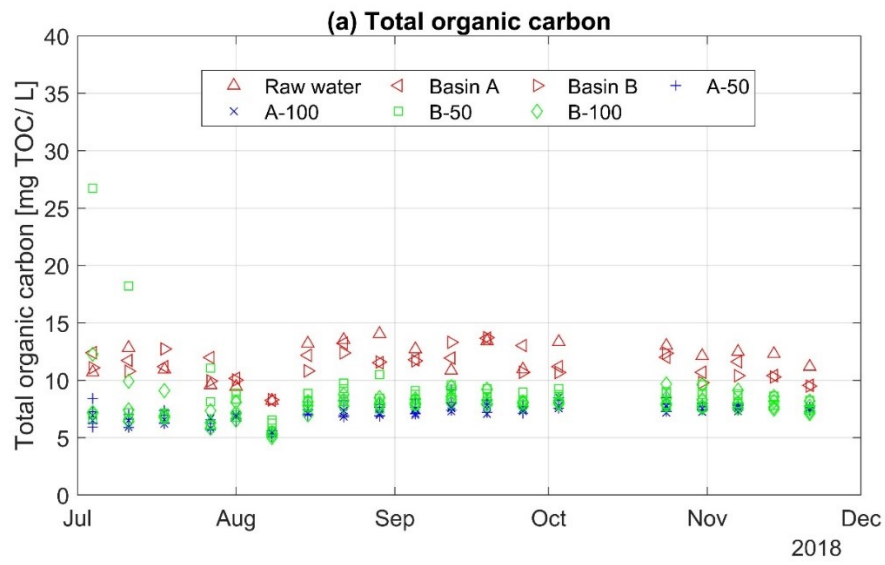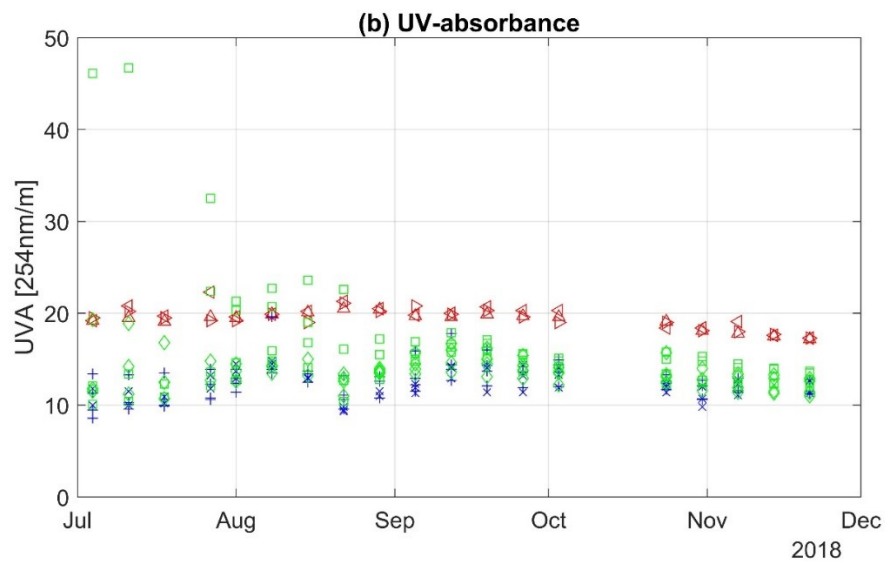

**Fig. A2** Natural organic matter variability during artificial recharge. The figure shows (a) TOC and (b) UVA from raw water, Basin A and B, and all individual soil water samplers

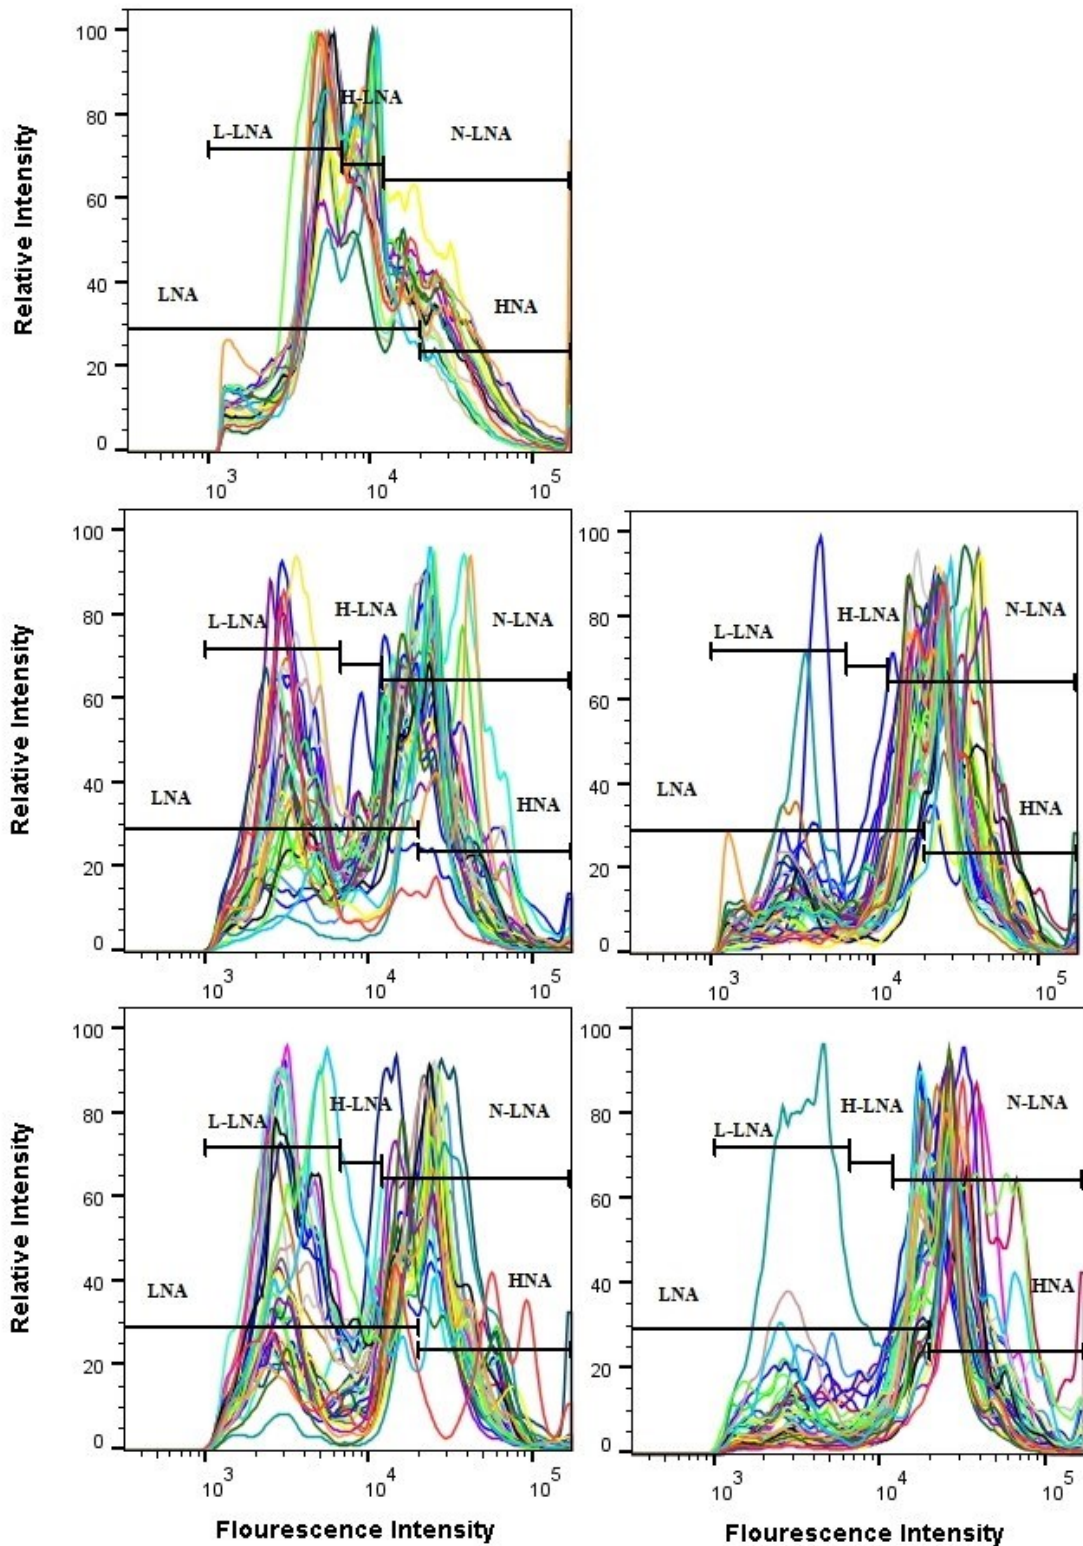

**Fig. A3** Fingerprints of all the collected fingerprints for the raw water (top left), A-50 (center left), A-100 (bottom left), B-50 (center right) and B-100 (bottom right). Each line represents one of the triplicates from each water sample. The figure shows a clear difference between samples taken from Basin A and B. Percent HNA was significantly higher in samplers under Basin B whereas the HNA peaks for both sides are similar to one another compared to the LNA peaks. The LNA peaks on the A-side are not present on the B-side, with three exceptions.

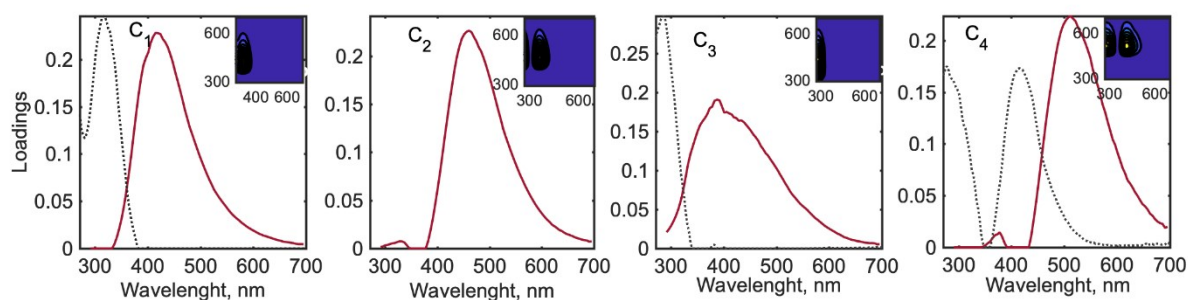

**Fig. A4** Spectral properties of the PARAFAC components.

**Table A1** All results from t-test conducted on the TOC and UVA measurements by comparing two pairs of locations ( $L_1$  and  $L_2$ ). Location “All samplers” refers to all soil water samples. A-50, B-50, A-100 and B-100 refers to all samplers at 50 and 100 cm under Basin A and B, respectively. The table shows the samplings location, the parameter, the mean value, the variance, p-value from one and two tailed test.

| Location, $L_1$     | Location, $L_2$     | Parameter                 | $\bar{T}_1 + \sigma^2$     | $\bar{T}_2 + \sigma^2$     | $\rho$ -value one tailed               | $\rho$ -value two tailed               |
|---------------------|---------------------|---------------------------|----------------------------|----------------------------|----------------------------------------|----------------------------------------|
| Raw water           | All samplers        | TOC (mg/ L)               | 11.8 + 2.6                 | 7.4 + 0.6                  | <b>1.6e-11</b>                         | <b>3.3e-11</b>                         |
| Raw water           | All samplers        | UVA ( $m^{-1}$ )          | 19.3 + 0.9                 | 12.8 + 1.5                 | <b>2.1e-19</b>                         | <b>4.3e-19</b>                         |
| 50 cm (all)         | 100 cm (all)        | TOC (mg/ L)               | 7.4 + 0.6                  | 7.4 + 0.6                  | 0.42                                   | 0.84                                   |
| 50 cm (all)         | 100 cm (all)        | UVA ( $m^{-1}$ )          | 12.8 + 1.9                 | 12.8 + 1.2                 | 0.49                                   | 0.98                                   |
| All samplers A-side | All samplers B-side | TOC (mg/ L)               | 7.2 + 0.5                  | 7.6 + 0.8                  | <b>0.05</b>                            | 0.10                                   |
| All samplers A-side | All samplers B-side | UVA ( $m^{-1}$ )          | 12.3 + 1.5                 | 13.5 + 1.7                 | <b>0.006</b>                           | <b>0.011</b>                           |
| A-50                | B-50                | TOC (mg/ L)               | 7.3 + 0.5                  | 7.6 + 0.8                  | 0.09                                   | 0.19                                   |
| A-100               | B-100               | TOC (mg/ L)               | 7.1 + 0.4                  | 7.5 + 0.7                  | <b>0.04</b>                            | 0.08                                   |
| A-50                | B-50                | UVA ( $m^{-1}$ )          | 12.5 + 1.7                 | 13.4 + 2.6                 | <b>0.03</b>                            | 0.06                                   |
| A-100               | B-100               | UVA ( $m^{-1}$ )          | 12.1 + 1.6                 | 13.5 + 1.6                 | <b>0.001</b>                           | <b>0.002</b>                           |
| A-50                | A-100               | TOC (mg/ L)               | 7.3 + 0.5                  | 7.1 + 0.4                  | 0.19                                   | 0.39                                   |
| B-50                | B-100               | TOC (mg/ L)               | 7.6 + 0.8                  | 7.5 + 0.7                  | 0.34                                   | 0.67                                   |
| A-50                | A-100               | UVA ( $m^{-1}$ )          | 12.5 + 1.7                 | 12.1 + 1.6                 | 0.19                                   | 0.37                                   |
| B-50                | B-100               | UVA ( $m^{-1}$ )          | 13.4 + 2.6                 | 13.5 + 1.6                 | 0.42                                   | 0.85                                   |
| Raw water           | All samplers        | TOC and UVA reduction (%) | 37 + 40                    | 34 + 40                    | <b>0.04</b>                            | 0.08                                   |
| Raw water           | B3 and B4-50        | C1                        | $0.73 + 1.8 \cdot 10^{-6}$ | $0.58 + 1 \cdot 10^{-4}$   | <b><math>1 \cdot 10^{-8}</math></b>    | <b><math>2 \cdot 10^{-8}</math></b>    |
| Raw water           | B3 and B4-50        | C2                        | $0.42 + 1.2 \cdot 10^{-6}$ | $0.35 + 7.3 \cdot 10^{-5}$ | <b><math>6.4 \cdot 10^{-7}</math></b>  | <b><math>1.3 \cdot 10^{-6}</math></b>  |
| Raw water           | B3 and B4-50        | C3                        | $0.45 + 6.6 \cdot 10^{-6}$ | $0.29 + 4.2 \cdot 10^{-5}$ | <b><math>9.4 \cdot 10^{-12}</math></b> | <b><math>1.9 \cdot 10^{-11}</math></b> |
| Raw water           | B3 and B4-50        | C4                        | $0.12 + 2 \cdot 10^{-6}$   | $0.11 + 1 \cdot 10^{-5}$   | <b><math>5.1 \cdot 10^{-5}</math></b>  | <b><math>1 \cdot 10^{-4}</math></b>    |

**Table A2** All results from t-test conducted on the flow cytometric measurements by comparing two pairs of locations ( $L_1$  and  $L_2$ ). Location “All samplers” refers to all soil water samples. A-50, B-50, A-100 and B-100 refers to all samplers at 50 and 100 cm under Basin A and B, respectively. The table shows the samplings location, the parameter, the mean value, the variance, p-value from one and two tailed test.

| Location, $L_1$     | Location, $L_2$     | Parameter       | $\bar{T}_1 + \sigma^2$               | $\bar{T}_2 + \sigma^2$               | $\rho$ -value one tailed               | $\rho$ value two tailed                |
|---------------------|---------------------|-----------------|--------------------------------------|--------------------------------------|----------------------------------------|----------------------------------------|
| Raw water           | All samplers        | TCC (cells/ mL) | $6.4 \cdot 10^6 + 4.4 \cdot 10^{12}$ | $7.4 \cdot 10^4 + 1 \cdot 10^9$      | <b><math>1.8 \cdot 10^{-10}</math></b> | <b><math>3.6 \cdot 10^{-11}</math></b> |
| A-50                | B-50                | TCC (cells/ mL) | $6.6 \cdot 10^4 + 3.9 \cdot 10^9$    | $9.2 \cdot 10^4 + 2.6 \cdot 10^{10}$ | 0.19                                   | 0.38                                   |
| All samplers A-side | All samplers B-side | TCC (cells/ mL) | $7.3 \cdot 10^4 + 4.8 \cdot 10^9$    | $7.7 \cdot 10^4 + 1.4 \cdot 10^{10}$ | 0.40                                   | 0.80                                   |
| A-50                | A-100               | TCC (cells/ mL) | $6.6 \cdot 10^4 + 4.1 \cdot 10^9$    | $7.9 \cdot 10^4 + 5.6 \cdot 10^9$    | 0.23                                   | 0.45                                   |
| B-50                | B-100               | TCC (cells/ mL) | $9.2 \cdot 10^4 + 2.6 \cdot 10^{10}$ | $6.2 \cdot 10^4 + 2.8 \cdot 10^9$    | 0.15                                   | 0.30                                   |

|                        |                        |           |          |          |                            |                             |
|------------------------|------------------------|-----------|----------|----------|----------------------------|-----------------------------|
| Raw water              | All samplers           | ICC (%)   | 41 + 600 | 78 + 200 | <b>2.8·10<sup>-6</sup></b> | <b>5.5·10<sup>-6</sup></b>  |
| A-50                   | B-50                   | ICC (%)   | 72 + 331 | 79 + 78  | <b>0.02</b>                | <b>0.04</b>                 |
| All samplers<br>A-side | All samplers<br>B-side | ICC (%)   | 74 + 281 | 80 + 94  | <b>0.005</b>               | <b>0.010</b>                |
| A-50                   | A-100                  | ICC (%)   | 72 + 330 | 76 + 230 | 0.18                       | 0.36                        |
| B-50                   | B-100                  | ICC (%)   | 79 + 78  | 81 + 110 | 0.23                       | 0.47                        |
| Raw water              | All samplers           | HNA (%)   | 20 + 30  | 46 + 30  | <b>3·10<sup>-17</sup></b>  | <b>5.2·10<sup>-17</sup></b> |
| A-50                   | B-50                   | HNA (%)   | 35 + 163 | 53 + 144 | <b>4·10<sup>-9</sup></b>   | <b>8·10<sup>-9</sup></b>    |
| All samplers<br>A-side | All samplers<br>B-side | HNA (%)   | 36 + 175 | 56 + 166 | <b>2·10<sup>-16</sup></b>  | <b>3·10<sup>-16</sup></b>   |
| A-50                   | A-100                  | HNA (%)   | 34 + 117 | 37 + 146 | 0.13                       | 0.27                        |
| B-50                   | B-100                  | HNA (%)   | 53 + 116 | 58 + 134 | <b>0.03</b>                | <b>0.05</b>                 |
| Raw water              | All samplers<br>A-side | L-LNA (%) | 40 + 33  | 35 + 27  | <b>0.003</b>               | <b>0.007</b>                |
| Raw water              | All samplers<br>B-side | L-LNA (%) | 40 + 33  | 16 + 13  | <b>4·10<sup>-15</sup></b>  | <b>9·10<sup>-15</sup></b>   |
| A-50                   | B-50                   | L-LNA (%) | 35 + 155 | 18 + 75  | <b>1·10<sup>-8</sup></b>   | <b>2·10<sup>-8</sup></b>    |
| All samplers<br>A-side | All samplers<br>B-side | L-LNA (%) | 35 + 27  | 16 + 13  | <b>6e·10<sup>-13</sup></b> | <b>1·10<sup>-12</sup></b>   |
| A-50                   | A-100                  | L-LNA (%) | 35 + 155 | 35 + 136 | 0.47                       | 0.94                        |
| B-50                   | B-100                  | L-LNA (%) | 18 + 75  | 15 + 83  | <b>0.05</b>                | 0.11                        |
| Raw water              | All samplers<br>A-side | H-LNA (%) | 26 + 10  | 10 + 3   | <b>2·10<sup>-16</sup></b>  | <b>4·10<sup>-16</sup></b>   |
| Raw water              | All samplers<br>B-side | H-LNA (%) | 26 + 10  | 7 + 4    | <b>2·10<sup>-19</sup></b>  | <b>3·10<sup>-19</sup></b>   |
| A-50                   | B-50                   | H-LNA (%) | 11 + 10  | 7 + 10   | <b>3·10<sup>-6</sup></b>   | <b>6·10<sup>-6</sup></b>    |
| All samplers<br>A-side | All samplers<br>B-side | H-LNA (%) | 10 + 3   | 7 + 4    | <b>4·10<sup>-6</sup></b>   | <b>8·10<sup>-6</sup></b>    |
| A-50                   | A-100                  | H-LNA (%) | 11 + 10  | 9 + 16   | <b>0.013</b>               | <b>0.026</b>                |
| B-50                   | B-100                  | H-LNA (%) | 7 + 10   | 6 + 6    | <b>0.07</b>                | <b>0.14</b>                 |
| Raw water              | All samplers<br>A-side | N-HNA (%) | 34 + 29  | 55 + 36  | <b>1·10<sup>-12</sup></b>  | <b>2·10<sup>-12</sup></b>   |
| Raw water              | All samplers<br>B-side | N-HNA (%) | 34 + 29  | 77 + 21  | <b>1·10<sup>-23</sup></b>  | <b>2·10<sup>-23</sup></b>   |
| A-50                   | B-50                   | N-HNA (%) | 54 + 149 | 75 + 84  | <b>3·10<sup>-11</sup></b>  | <b>7·10<sup>-11</sup></b>   |
| All samplers<br>A-side | All samplers<br>B-side | N-HNA (%) | 55 + 36  | 77 + 21  | <b>3·10<sup>-13</sup></b>  | <b>6·10<sup>-13</sup></b>   |
| A-50                   | A-100                  | N-HNA (%) | 54 + 149 | 56 + 204 | 0.29                       | 0.58                        |
| B-50                   | B-100                  | N-HNA (%) | 75 + 84  | 79 + 107 | <b>0.03</b>                | 0.06                        |

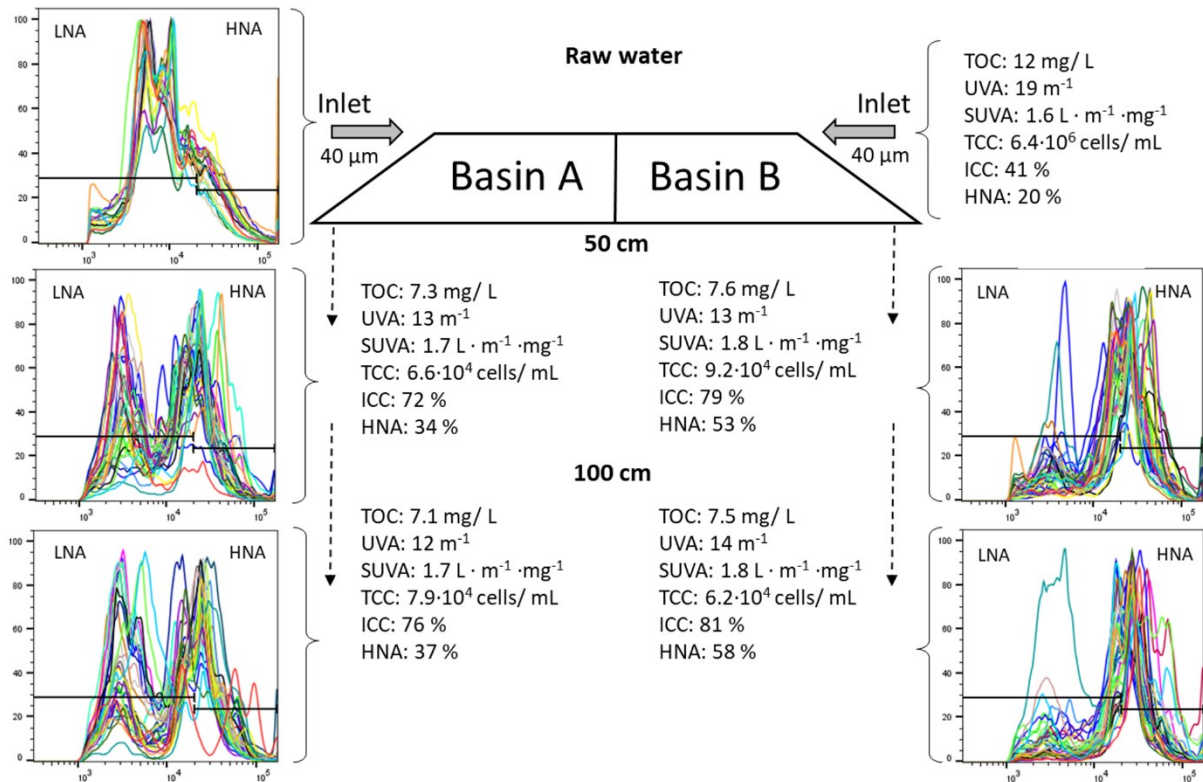

**Fig. A5** Overview of all the results during the whole period. The TOC, UVA, SUVA<sub>TOC</sub>, TCC, % ICC and % HNA measurements are presented as averages over the whole period.
